# Supplementary material for: Prognostic Role of Elevated Myeloperoxidase in Patients with Acute Coronary Syndrome: A Systemic Review and Meta-Analysis
Source: Hindawi journal article supplement (doi:10.1155/2019/2872607), 2019-06-25
Supplement: f1 [file 2872607.f1.pdf]

**Supplemental Table 1. A MEDLINE search strategy:**

| #   | Search                                         | Results |
|-----|------------------------------------------------|---------|
| #1  | "Peroxidase"[Mesh]                             | 134863  |
| #2  | "Biomarkers" [Mesh]                            | 800721  |
| #3  | "Inflammation Mediators"[Mesh]                 | 361740  |
| #4  | #1 OR #2 OR #3                                 | 1137062 |
| #5  | "Myocardial Infarction" [Mesh]                 | 161335  |
| #6  | "Acute Coronary Syndrome" [Mesh]               | 11907   |
| #7  | "Non-ST Elevated Myocardial Infarction" [Mesh] | 211     |
| #8  | "Angina, Unstable"[Mesh]                       | 10563   |
| #9  | #5 OR #6 OR #7 OR #8                           | 175986  |
| #10 | "Prognosis"[Mesh]                              | 1368644 |
| #11 | "Predictive Value of Tests"[Mesh]              | 175855  |
| #12 | #10 OR #11                                     | 1487900 |
| #13 | #4 And #9 And #12                              | 3586    |

**Supplemental Table 1.B Scopus Search Strategy**

| # | Search terms                                                                                                                                                                                                                                                                                                                                                                                                                                                                                                                                                                                                                                                                                                                                                                                                                                                                                                                                                                                                                                                                                                     | Results    |
|---|------------------------------------------------------------------------------------------------------------------------------------------------------------------------------------------------------------------------------------------------------------------------------------------------------------------------------------------------------------------------------------------------------------------------------------------------------------------------------------------------------------------------------------------------------------------------------------------------------------------------------------------------------------------------------------------------------------------------------------------------------------------------------------------------------------------------------------------------------------------------------------------------------------------------------------------------------------------------------------------------------------------------------------------------------------------------------------------------------------------|------------|
|   | ( ALL ( peroxidase ) OR ALL ( myeloperoxidase ) OR ALL ( biomarkers ) ) AND ( ALL ( prognosis ) ) AND ( ALL ( myocardial AND infarction ) OR ALL ( acute AND coronary AND syndrome ) OR ALL ( non-st AND elevated AND myocardial AND infarction ) OR ALL ( unstable AND angina ) ) AND NOT ( ALL ( cancer ) OR ALL ( carcinoma ) OR ALL ( aortic AND stenosis ) OR ALL ( mice ) OR ALL ( thyroid ) OR ALL ( pancreas ) OR ALL ( renal ) OR ALL ( liver ) OR ALL ( kidney ) OR ALL ( leukemia ) OR ALL ( tumor ) OR ALL ( immunohistochemistry ) OR ALL ( uterus ) OR ( animals ) OR ( prostate ) OR ALL ( in AND vitro ) OR ALL ( infection ) OR ALL ( lymphoma ) OR ALL ( epithelial AND cells ) OR ALL ( lung ) OR ALL ( gene ) OR ALL ( genetic ) OR ALL ( rabbit ) OR ALL ( rats ) OR ALL ( bone ) OR ALL ( mineral ) OR ( intestinal ) OR ( intestine ) OR ALL ( pulmonary ) OR ALL ( environment ) OR ALL ( brain ) OR ALL ( sepsis ) OR ALL ( psychosis ) OR ALL ( colon ) OR ALL ( case AND report ) OR ( arthritis ) ) AND ( LIMIT-TO ( LANGUAGE , "English" ) ) AND ( LIMIT-TO ( SUBJAREA , "MEDI" ) ) | <b>904</b> |

**Supplemental Table 2. The definition of Major adverse cardiac events of the included studies in the meta-analysis.**

---

| <b>Study</b>                         | <b>Major adverse cardiac events (MACE) definition</b>                                                                                                 |
|--------------------------------------|-------------------------------------------------------------------------------------------------------------------------------------------------------|
| <b>Apple<sup>20</sup></b>            | A composite endpoint of the first recurrent MI, PCI, CABG, or cardiac death.                                                                          |
| <b>Brügger Andersen<sup>25</sup></b> | Recurrent TnT-positive ACS or cardiac death.                                                                                                          |
| <b>Chang<sup>26</sup></b>            | A composite endpoint of advanced Killip score (defined as Killip classification $\geq 3$ ) upon presentation, re-infarction, repeat PCI or mortality. |
| <b>Eggers<sup>9</sup></b>            | A composite endpoint of mortality and acute MI.                                                                                                       |
| <b>Kaya<sup>10</sup></b>             | cardiac death; reinfarction; new hospital admission for angina; heart failure; and revascularization procedures by means of CABG or PCI.              |
| <b>Oemrawsingh<sup>23</sup></b>      | A composite endpoint of all-cause mortality and non-fatal MI.                                                                                         |

---

MI, Myocardial infarction; PCI, percutaneous coronary intervention; CABG, coronary artery bypass graft; TnT, Cardiac troponin.  
T; ACS, Acute coronary syndrome.

**Supplemental Table 3. Assessment the quality of the included studies using the Newcastle-Ottawa quality assessment scale:**

| Study                 | Selection                                |                                     |                           |                                                                              | Comparability | Ascertainment of outcome                                        |                                          |                                             | Total Score |
|-----------------------|------------------------------------------|-------------------------------------|---------------------------|------------------------------------------------------------------------------|---------------|-----------------------------------------------------------------|------------------------------------------|---------------------------------------------|-------------|
|                       | Representativeness of the exposed cohort | Selection of the non-exposed cohort | Ascertainment of exposure | Demonstration that outcome of interest was not present at start of the study |               | Comparability of cohorts on the basis of the design or analysis | Independent assessment or record linkage | Follow up long enough for outcomes to occur |             |
| Apple [31]            | *                                        | *                                   | *                         | *                                                                            | *             | *                                                               | *                                        | *                                           | 8           |
| Baldus [34]           | *                                        | *                                   | *                         | *                                                                            | *             | #                                                               | *                                        | *                                           | 7           |
| Brügger-Andersen [30] | *                                        | *                                   | *                         | *                                                                            | **            | *                                                               | *                                        | *                                           | 9           |
| Cavusoglu [38]        | *                                        | *                                   | *                         | *                                                                            | **            | *                                                               | *                                        | *                                           | 9           |
| Chang [28]            | *                                        | *                                   | *                         | *                                                                            | *             | #                                                               | \$                                       | *                                           | 6           |



# No evidence of independent blind assessment of outcomes or linkage to patient's record, however we believe that the lack of blinding could have less likely introduced a risk of bias in evaluating our outcomes of interest. \$ follow up is 30 days. A maximum two stars can be given for comparability based on the number of risk factors they adjusted for.

## Supplemental Figure Legends:

**Supplemental Figure 1.** Meta-regression for risk factors of Mortality. X axis represents the observed effect size of studies. Y is Meta-regression coefficient. Age (Y= - 0.12; P=0.32). Female (-8.61; P= 0.0048). ACS (Y=-0.071; P=0.94). DM (Y=3.522; P=0.32). Hypertension (Y=0.20; P=0.911). Smoking (Y=1.44; P=0.55).

**Supplemental Figure 2.** Meta-regression for risk factors of Major Adverse cardiac events. X axis represents the observed effect size of studies. Y is Meta-regression coefficient. Age (Y= - 0.112; P=0.28). Female (-3.15; P= 0.301). ACS (Y=-0.22; P=0.897). DM (Y= -0.353; P=0.89). Hypertension (Y=0.74; P=0.785). Smoking (Y=2.04; P=0.28).

**Supplemental Figure 3.** Meta-regression for risk factors of Recurrent Myocardial infraction. X axis represents the observed effect size of studies. Y is Meta-regression coefficient. Age (Y= - 0.03; P=0.68). Female (-2.23; P= 0.06). ACS (Y=-0.11; P=0.89). DM (Y= 2.0; P=0.286). Hypertension (Y=1.13; P=0.37). Smoking (Y=4.8; P=0.204).

**Supplemental Figure 4.** Forest Plot displays Sensitivity analysis using the one study removed method. High myeloperoxidase is significantly associated with mortality (odds ratio 2.040; 95% confidence interval [CI]: 1.405-2.960, p=0.000). High MPO showed a trend for developing major adverse cardiac events (odds ratio 1.421; 95% confidence interval [CI]: 1.010-1.999, p=0.044) and recurrent MI (odds ratio 1.241; 95% confidence interval [CI]: 0.996-1.545, p=0.054).

**Supplemental Figure 5.** Forest Plot displays Cumulative meta-analysis. High myeloperoxidase is significantly associated with mortality (odds ratio 2.040; 95% confidence interval [CI]: 1.405-2.960, p=0.000). High MPO showed a trend for developing major adverse

cardiac events (odds ratio 1.421; 95% confidence interval [CI]: 1.010-1.999,  $p=0.044$ ) and recurrent MI (odds ratio 1.241; 95% confidence interval [CI]: 0.996-1.545,  $p=0.054$ ).

**Supplemental Figure 6.** Funnel plot of all studies included in the meta-analysis. The Standard Error (SE) of the log Odds Ratio of each study was plotted against the Odds Ratio for mortality. No skewed distribution was observed, suggesting no publication bias.

**Supplemental Figure 7.** Funnel plot of all studies included in the meta-analysis. The Standard Error (SE) of the log Odds Ratio of each study was plotted against the Odds Ratio for major adverse cardiac events. No skewed distribution was observed, suggesting no publication bias.

**Supplemental Figure 8.** Funnel plot of all studies included in the meta-analysis. The Standard Error (SE) of the log Odds Ratio of each study was plotted against the Odds Ratio for recurrent myocardial infraction. No skewed distribution was observed, suggesting no publication bias.

# Mortality

## Regression of Log odds ratio on Age

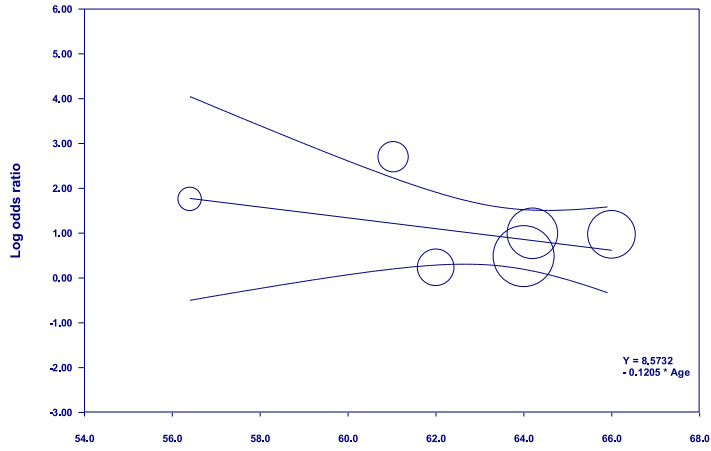

## Regression of Log odds ratio on Female

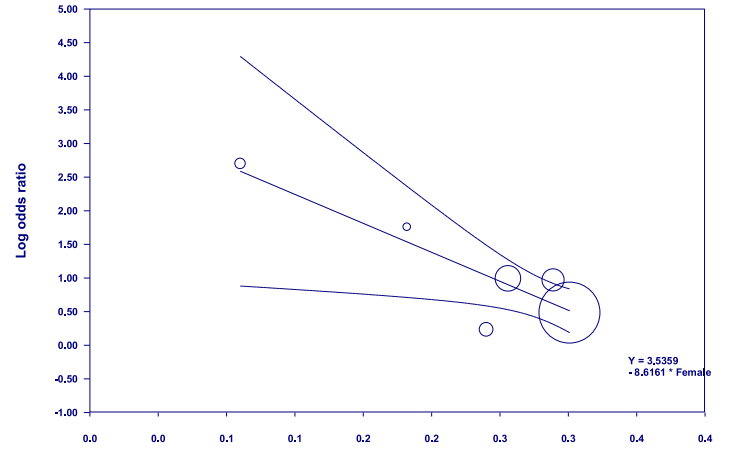

## Regression of Log odds ratio on ACS

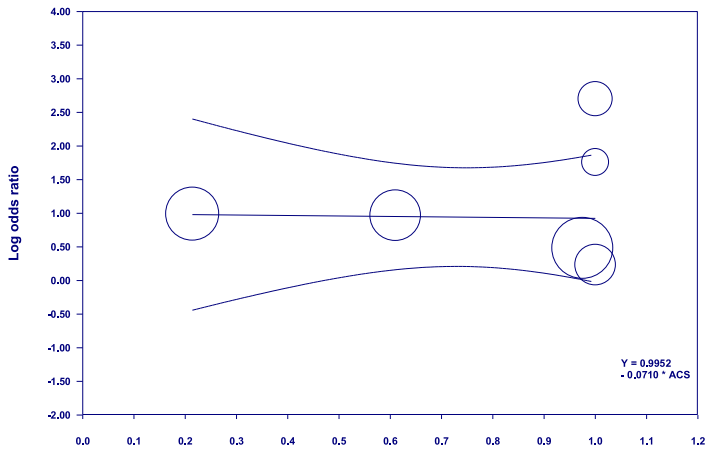

## Regression of Log odds ratio on DM

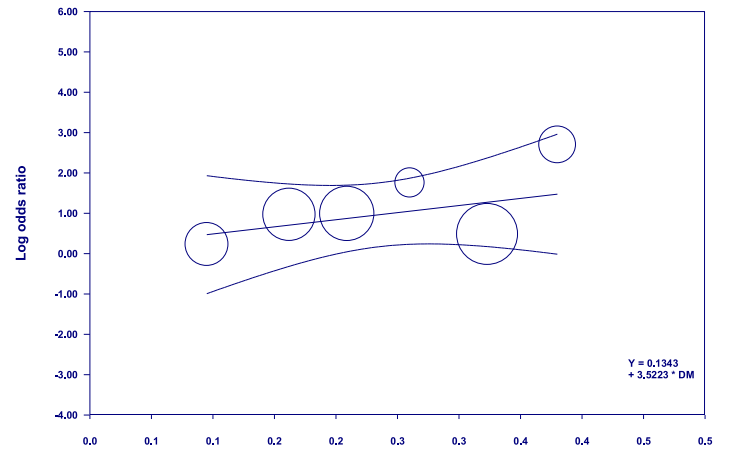

## Regression of Log odds ratio on HTN

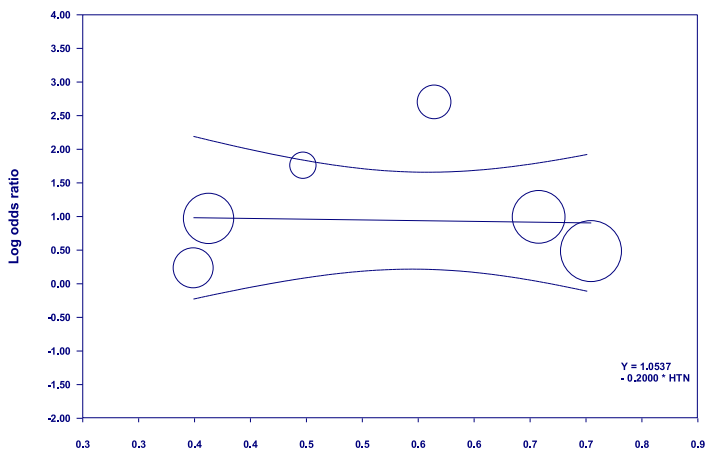

## Regression of Log odds ratio on Smoking

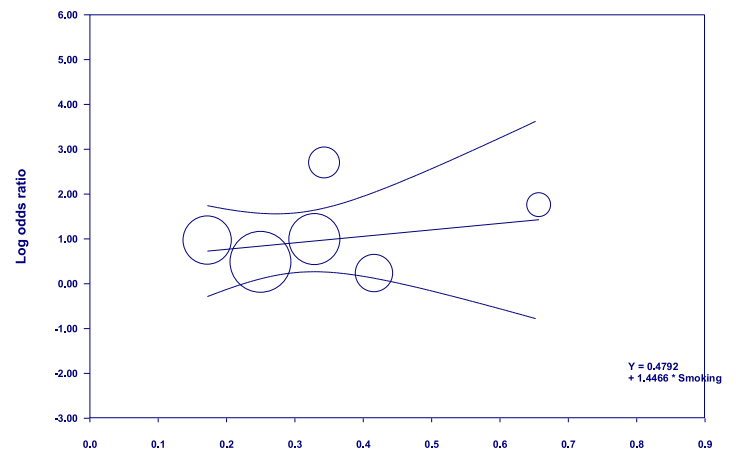



# Major adverse cardiac events

## Regression of Log odds ratio on Age

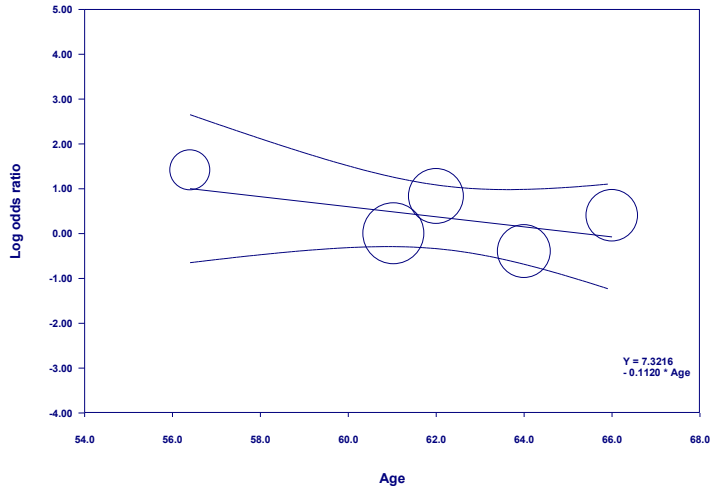

## Regression of Log odds ratio on Female

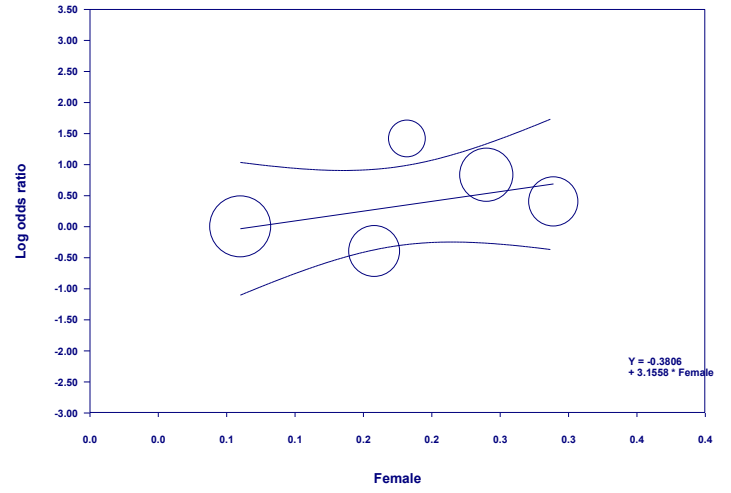

## Regression of Log odds ratio on ACS

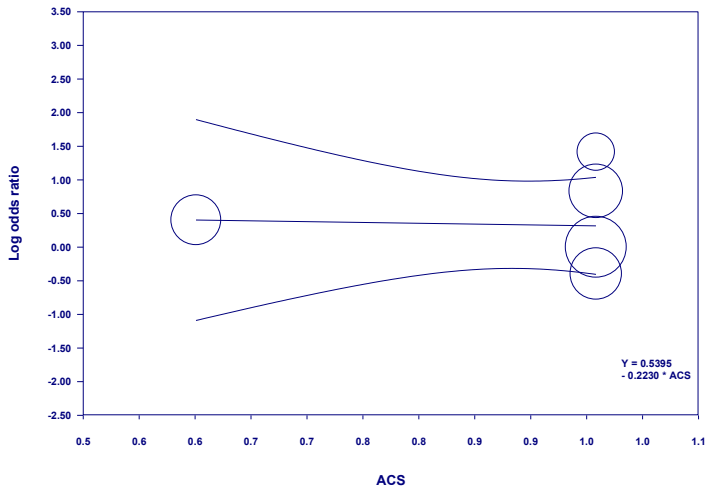

## Regression of Log odds ratio on DM

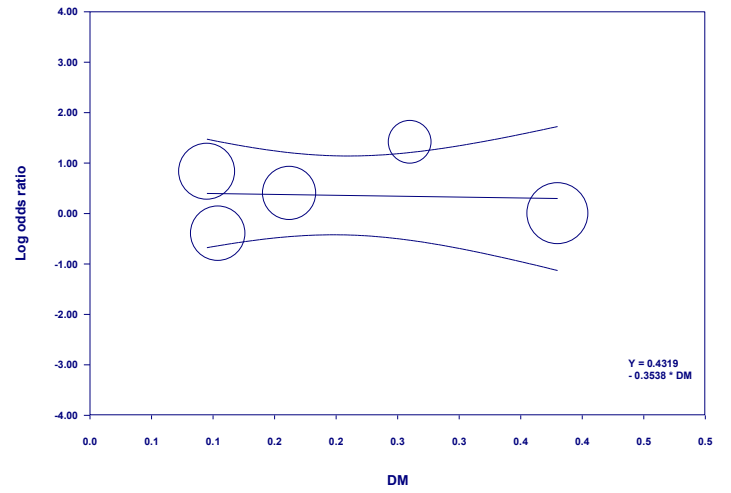

## Regression of Log odds ratio on HTN

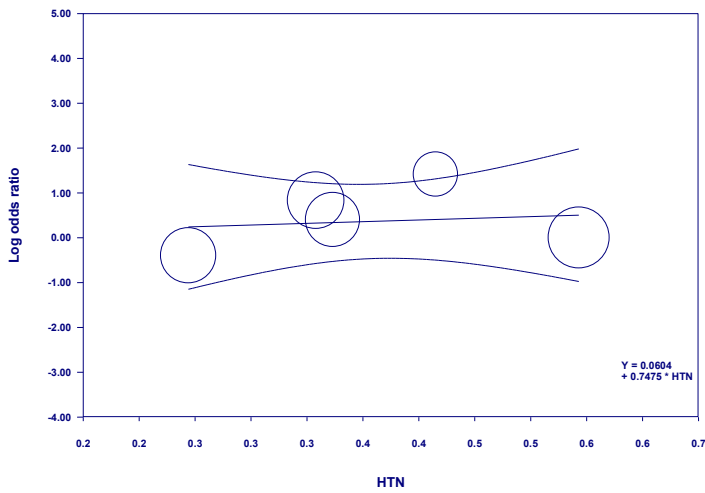

## Regression of Log odds ratio on Smoking

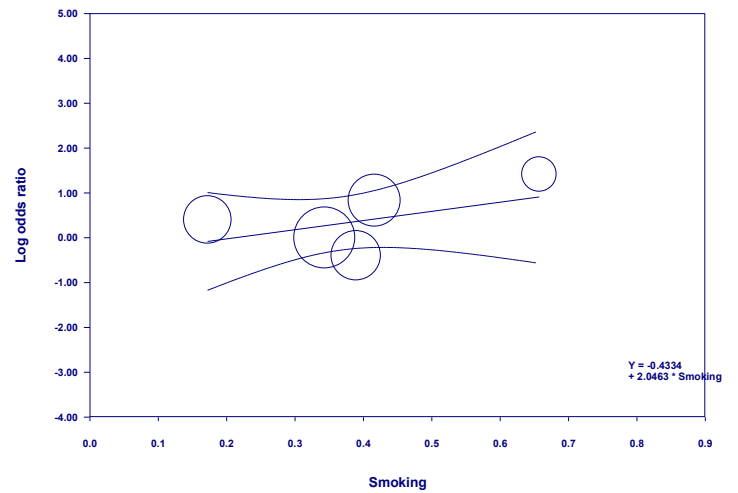

# Recurrent myocardial infarction

## Regression of Log odds ratio on Age

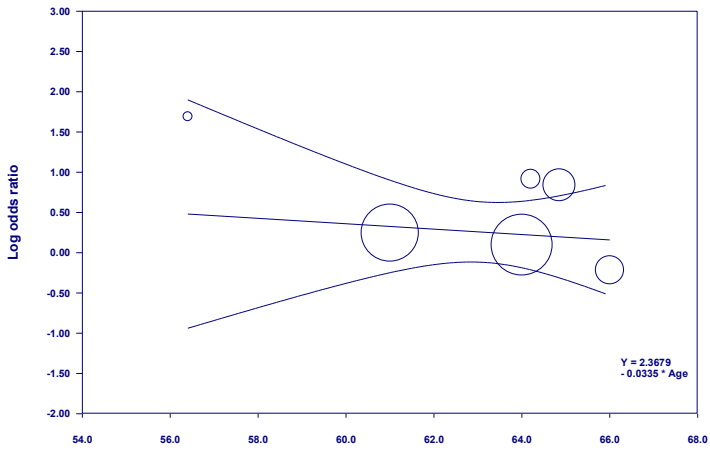

## Regression of Log odds ratio on Female

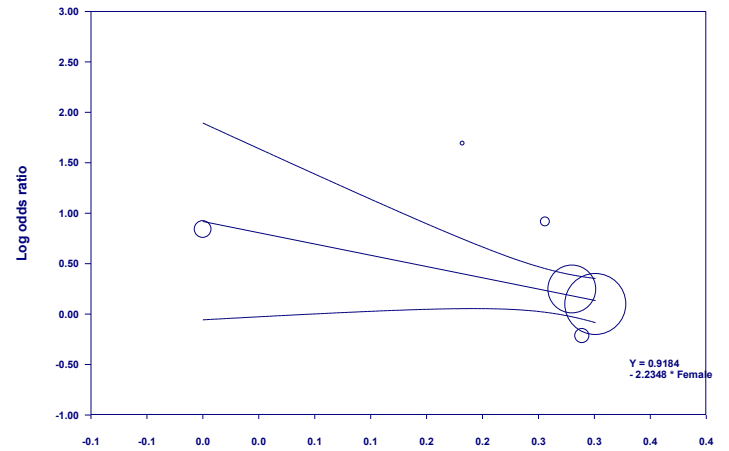

## Regression of Log odds ratio on ACS

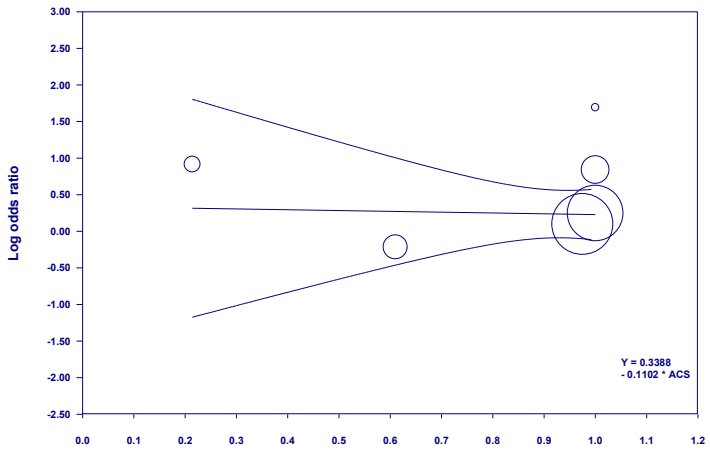

## Regression of Log odds ratio on DM

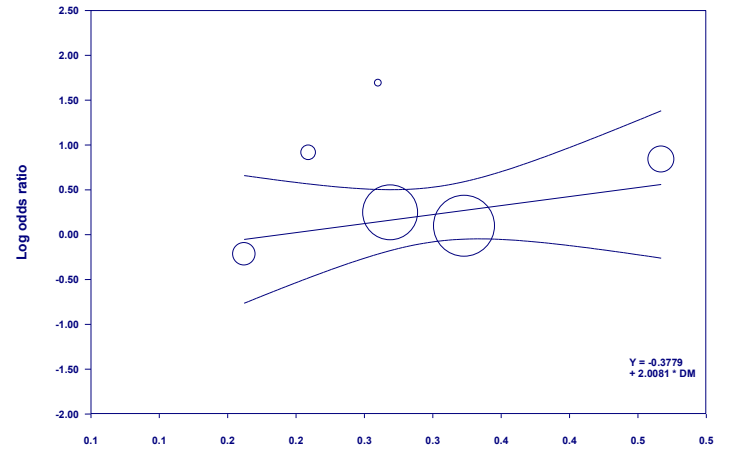

## Regression of Log odds ratio on HTN

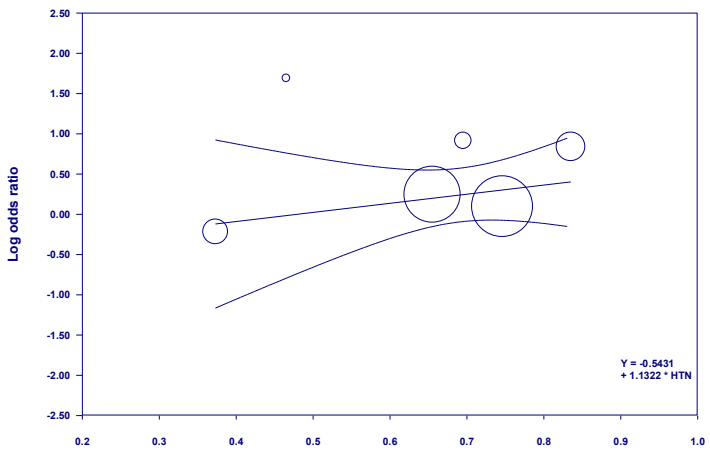

## Regression of Log odds ratio on Smoking

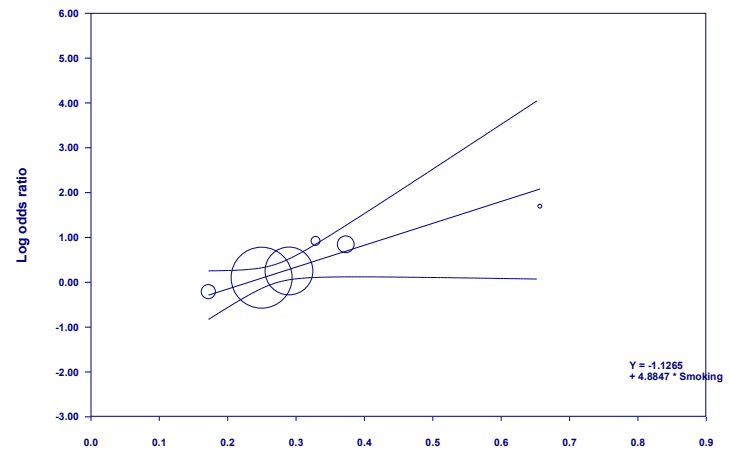

**Study name**

**Statistics with study removed**

**Odds ratio (95% CI) with study removed**

**Point Lower limit Upper limit Z-Value p-Value**

**A. Mortality**

|                 |       |       |       |       |       |
|-----------------|-------|-------|-------|-------|-------|
| Baldus 2003     | 2.125 | 1.423 | 3.175 | 3.682 | 0.000 |
| Chang 2009      | 1.852 | 1.400 | 2.451 | 4.315 | 0.000 |
| Eggers 2009     | 1.976 | 1.299 | 3.005 | 3.185 | 0.001 |
| Mocatta 2007    | 1.992 | 1.269 | 3.126 | 2.997 | 0.003 |
| Kaya 2012       | 1.984 | 1.358 | 2.898 | 3.543 | 0.000 |
| Scirica BM 2011 | 2.209 | 1.371 | 3.559 | 3.257 | 0.001 |
| Rahman 2016     | 2.119 | 1.440 | 3.117 | 3.813 | 0.000 |
| Koch 2014       | 1.955 | 1.282 | 2.983 | 3.111 | 0.002 |
| Apple 2007      | 2.253 | 1.552 | 3.270 | 4.271 | 0.000 |
|                 | 2.040 | 1.405 | 2.960 | 3.751 | 0.000 |

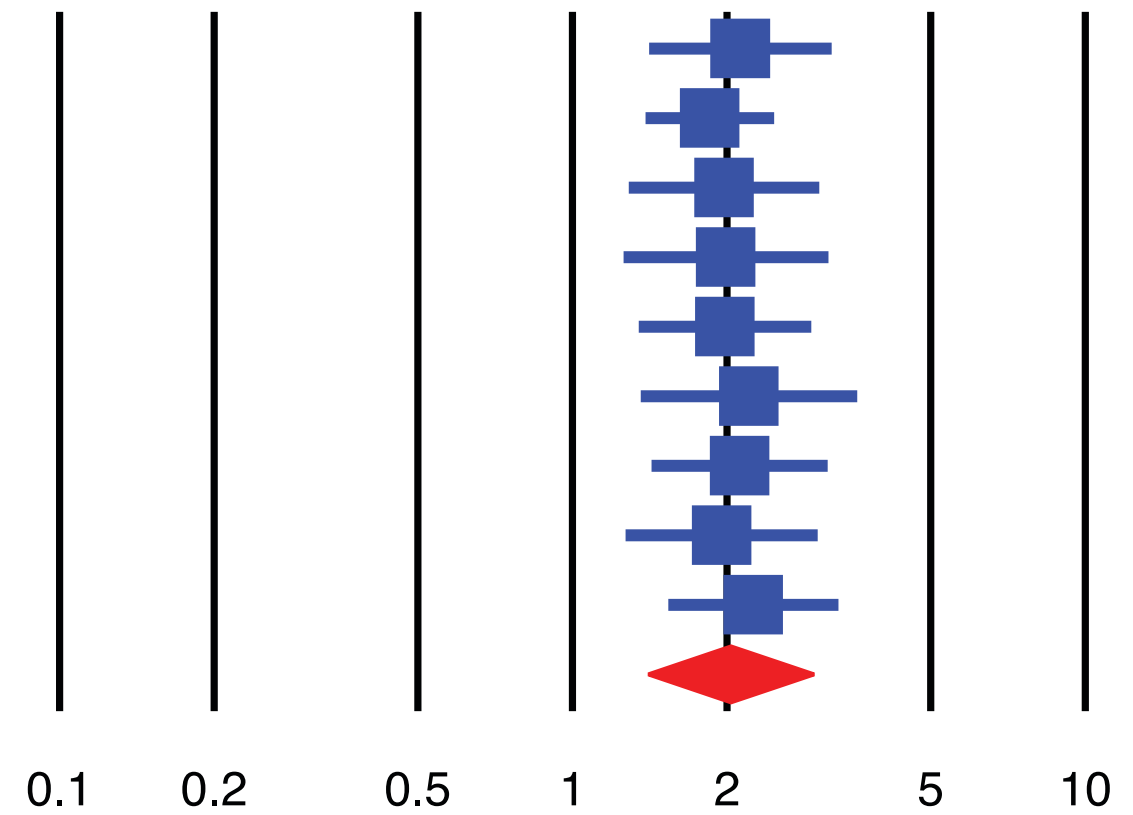

**B. MACE**

|                         |       |       |       |       |       |
|-------------------------|-------|-------|-------|-------|-------|
| <b>Chang 2009</b>       | 1.581 | 1.075 | 2.325 | 2.330 | 0.020 |
| <b>Brügger 2008</b>     | 1.605 | 1.096 | 2.349 | 2.432 | 0.015 |
| <b>Eggers 2009</b>      | 1.418 | 0.973 | 2.067 | 1.815 | 0.069 |
| <b>Kaya 2012</b>        | 1.326 | 0.954 | 1.842 | 1.680 | 0.093 |
| <b>Oemrawsingh 2011</b> | 1.434 | 0.933 | 2.204 | 1.642 | 0.101 |
| <b>Apple 2007</b>       | 1.373 | 0.956 | 1.971 | 1.718 | 0.086 |
|                         | 1.421 | 1.010 | 1.999 | 2.014 | 0.044 |

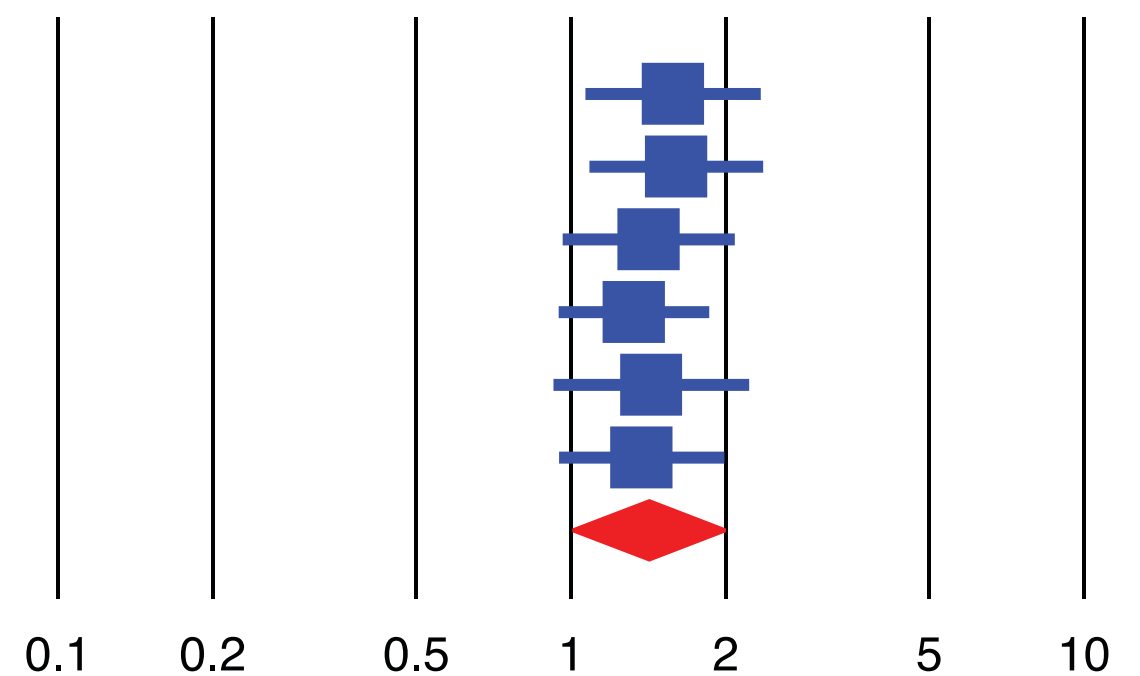

**C. Recurrent MI**

|                 |       |       |       |       |       |
|-----------------|-------|-------|-------|-------|-------|
| Marrow 2008     | 1.340 | 0.870 | 2.063 | 1.328 | 0.184 |
| Eggers 2009     | 1.284 | 1.009 | 1.634 | 2.032 | 0.042 |
| Cavusoglu 2007  | 1.171 | 0.988 | 1.388 | 1.819 | 0.069 |
| Kaya 2012       | 1.233 | 0.986 | 1.542 | 1.839 | 0.066 |
| Scirica BM 2011 | 1.407 | 0.996 | 1.988 | 1.937 | 0.053 |
| Koch 2014       | 1.221 | 0.977 | 1.527 | 1.753 | 0.080 |
|                 | 1.241 | 0.996 | 1.545 | 1.927 | 0.054 |

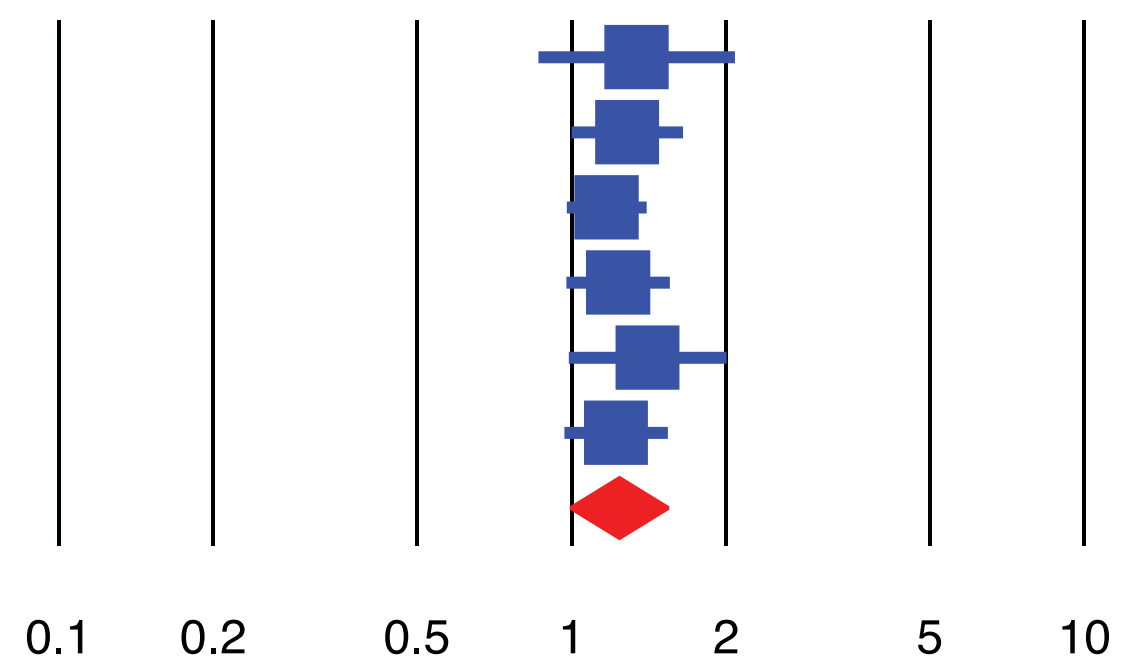

**Favors low MPO**

**Favors high MPO**

**Supplemental Figure 4.**

**Study name**

**Cumulative statistics**

**Cumulative odds ratio (95% CI)**

**Point Lower limit Upper limit Z-Value p-Value**

**A. Mortality**

|                 |       |       |        |       |       |
|-----------------|-------|-------|--------|-------|-------|
| Baldus 2003     | 1.263 | 0.365 | 4.372  | 0.368 | 0.713 |
| Chang 2009      | 4.100 | 0.366 | 45.880 | 1.145 | 0.252 |
| Eggers 2009     | 3.242 | 1.024 | 10.268 | 2.000 | 0.046 |
| Mocatta 2007    | 2.760 | 1.448 | 5.262  | 3.084 | 0.002 |
| Kaya 2012       | 2.861 | 1.597 | 5.125  | 3.533 | 0.000 |
| Scirica BM 2011 | 2.345 | 1.479 | 3.719  | 3.625 | 0.000 |
| Rahman 2016     | 2.207 | 1.424 | 3.419  | 3.543 | 0.000 |
| Koch 2014       | 2.253 | 1.552 | 3.270  | 4.271 | 0.000 |
| Apple 2007      | 2.040 | 1.405 | 2.960  | 3.751 | 0.000 |
|                 | 2.040 | 1.405 | 2.960  | 3.751 | 0.000 |

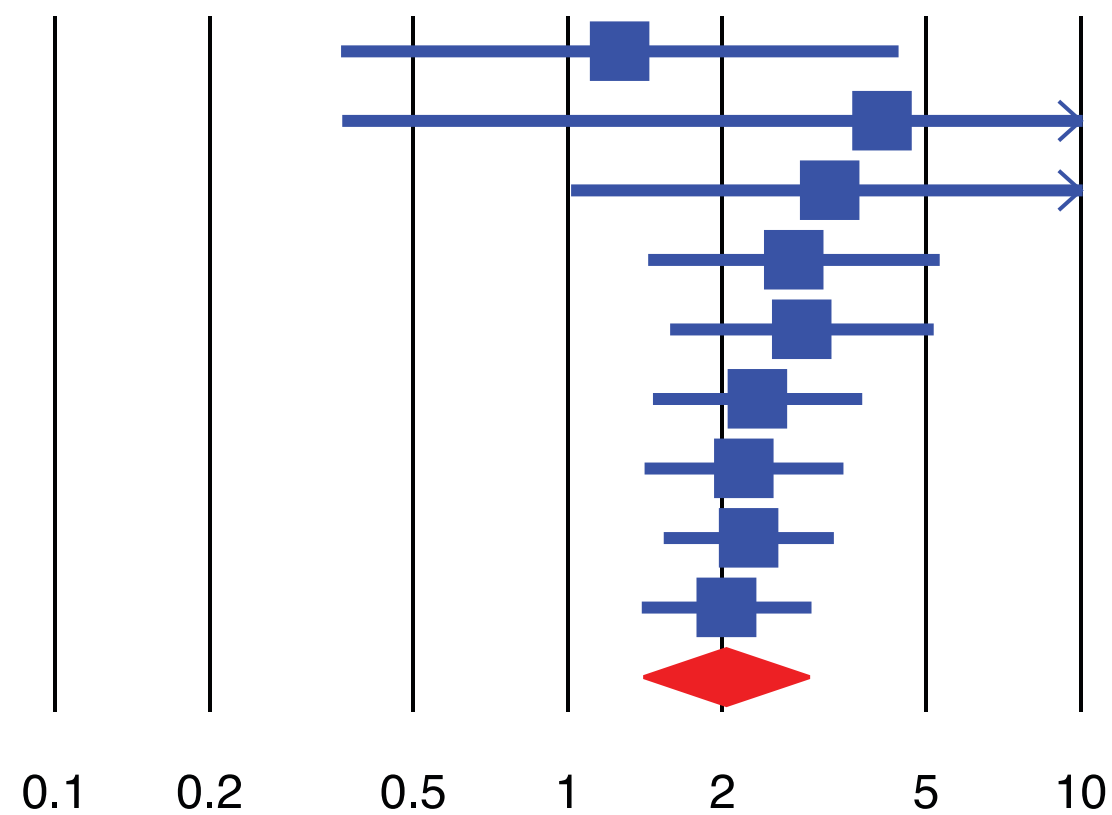

**B. MACE**

|                  |       |       |       |       |       |
|------------------|-------|-------|-------|-------|-------|
| Chang 2009       | 1.454 | 0.647 | 3.267 | 0.907 | 0.364 |
| Brügger 2008     | 1.158 | 0.664 | 2.020 | 0.517 | 0.605 |
| Eggers 2009      | 1.215 | 0.775 | 1.904 | 0.850 | 0.395 |
| Kaya 2012        | 1.374 | 0.855 | 2.208 | 1.315 | 0.189 |
| Oemrawsingh 2011 | 1.373 | 0.956 | 1.971 | 1.718 | 0.086 |
| Apple 2007       | 1.421 | 1.010 | 1.999 | 2.014 | 0.044 |
|                  | 1.421 | 1.010 | 1.999 | 2.014 | 0.044 |

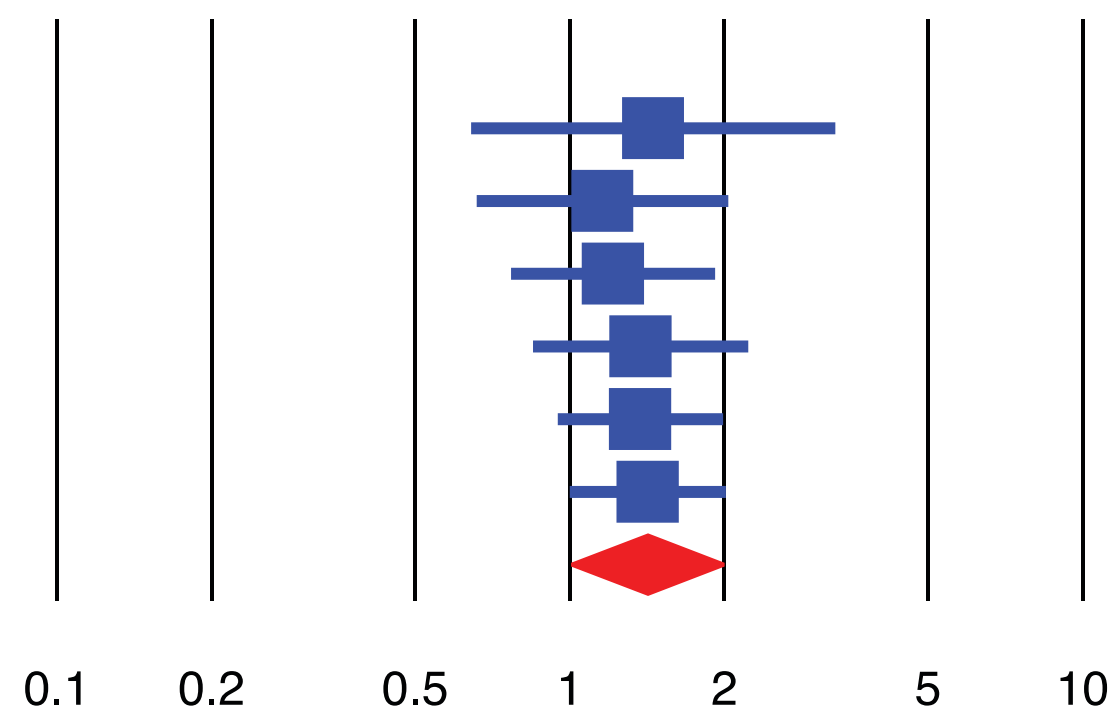

**C. Recurrent MI**

|                 |       |       |       |       |       |
|-----------------|-------|-------|-------|-------|-------|
| Marrow 2008     | 1.280 | 0.965 | 1.696 | 1.715 | 0.086 |
| Eggers 2009     | 1.231 | 0.940 | 1.612 | 1.510 | 0.131 |
| Cavusoglu 2007  | 1.347 | 0.875 | 2.072 | 1.353 | 0.176 |
| Kaya 2012       | 1.375 | 0.920 | 2.057 | 1.553 | 0.120 |
| Scirica BM 2011 | 1.221 | 0.977 | 1.527 | 1.753 | 0.080 |
| Koch 2014       | 1.241 | 0.996 | 1.545 | 1.927 | 0.054 |
|                 | 1.241 | 0.996 | 1.545 | 1.927 | 0.054 |

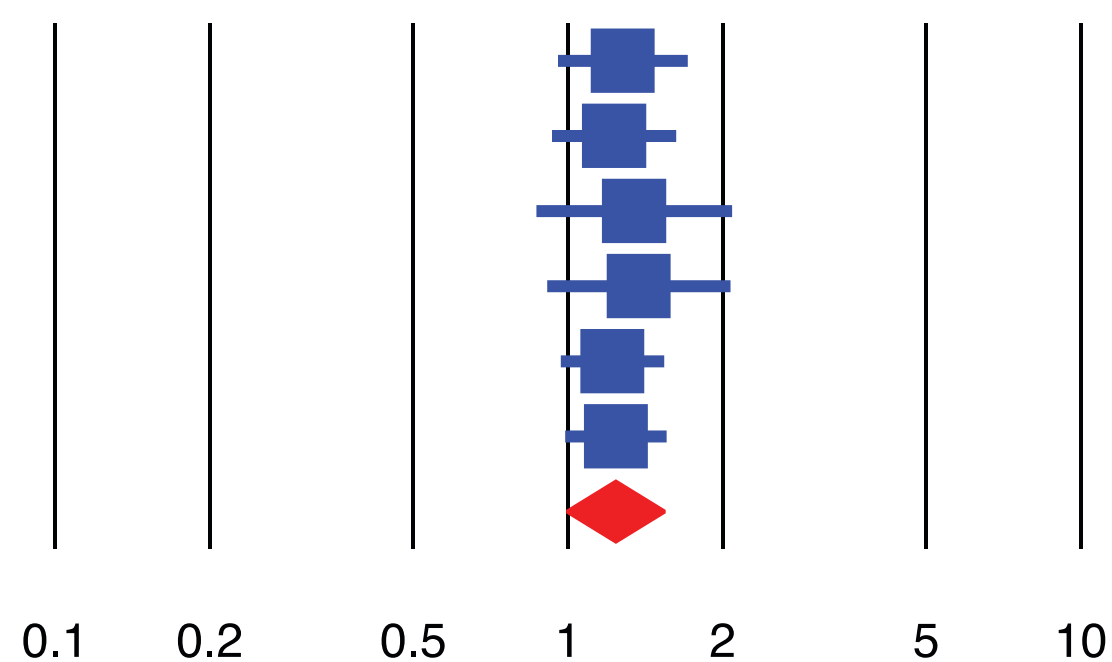

**Favors low MPO    Favors high MPO**

**Supplemental Figure 5.**

# Mortality

Funnel Plot of Standard Error by Log odds ratio

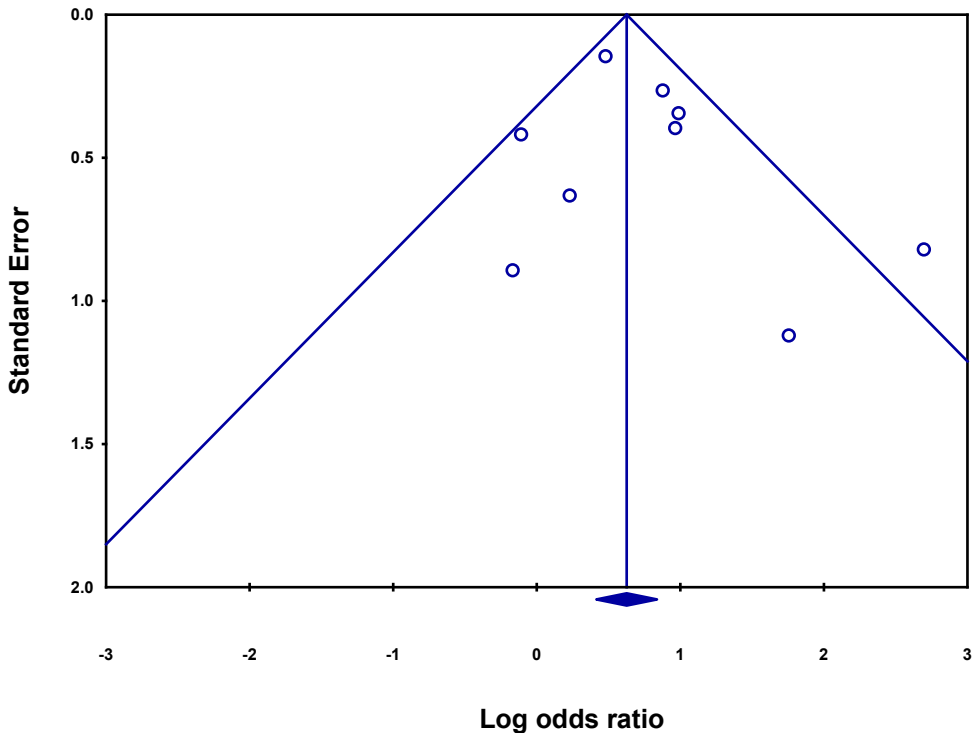

Supplemental Figure 6.

# Major adverse cardiac events

Funnel Plot of Standard Error by Log odds ratio

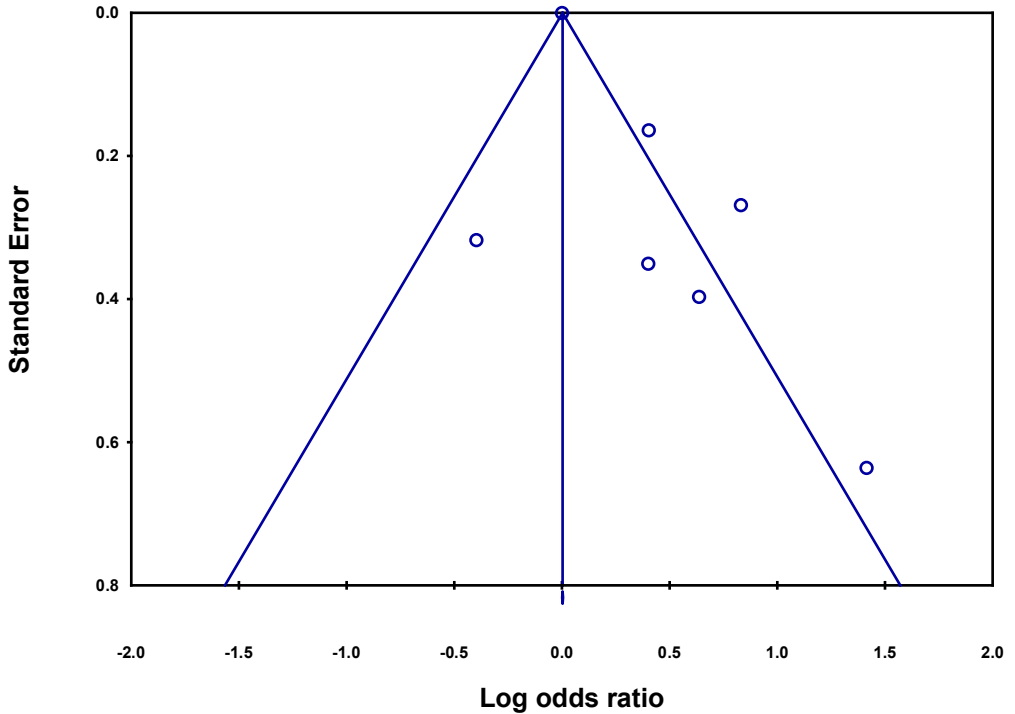

Supplemental Figure 7.

# Recurrent myocardial infarction

Funnel Plot of Standard Error by Log odds ratio

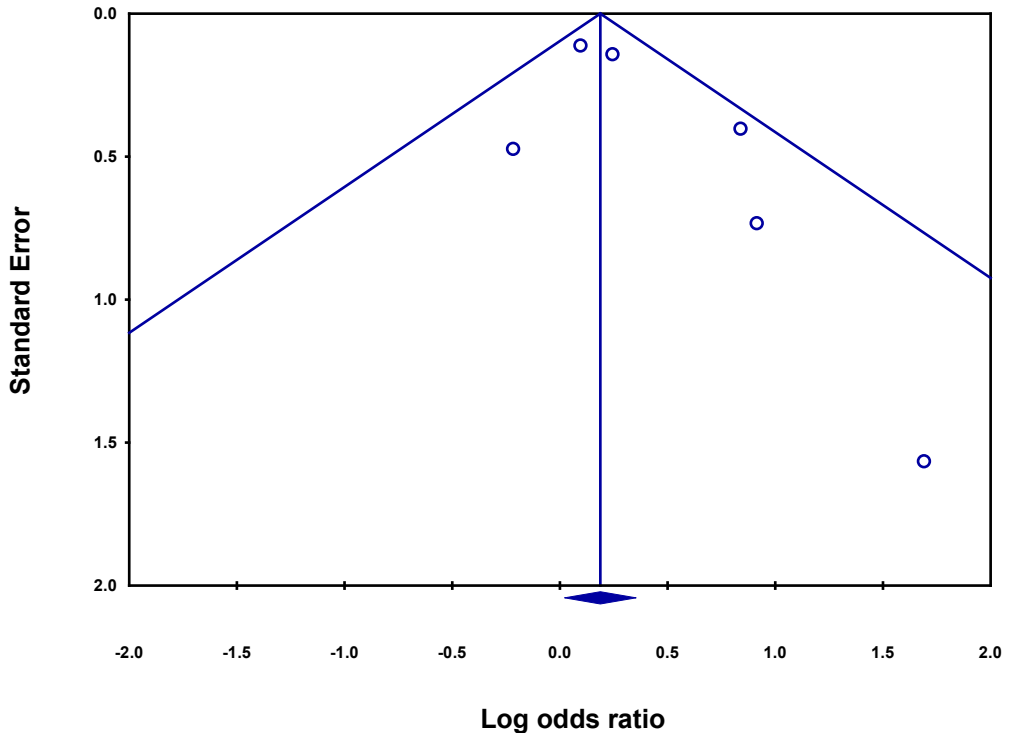

Supplemental Figure 8.
